# Supplementary material
Source: PubMed Central journal article supplement (PMC2984160)
Supplement: 1006436107_pnas.201006436SI.pdf [file 1006436107_pnas.201006436SI.pdf]

# Supporting Information

Hickman and Rusche 10.1073/pnas.1006436107

## SI Materials and Methods

**Yeast Strains.** Strains used in this study were derived from CK213 and SAY538 (Table S1). The *sir2* $\Delta$ ::*NatMX*, *sir4* $\Delta$ ::*URA3*, *sum1* $\Delta$ ::*NatMX*, *SIR2*-HA, *SIR4*-Flag, and *myc-SUM1* alleles were previously described (1). The *ORC1*-V5, *ORC4*-V5, and *ORC5*-Flag alleles were constructed by integrating the epitope tag plus a selectable marker at the end of the ORF. Tagging cassettes were generated from p3FLAG-KanMX (2) or pFA6a-6xGLY-V5-hphMX4 (3). Antibiotic supplements were used at 200  $\mu$ g/mL for geneticin and 300  $\mu$ g/mL for hygromycin B. The *orc1*- $\Delta$ *bah*, *orc1*-*E124K*, and *orc1*-*P185L* mutations were obtained by first cloning the complete *ORC1*-V5 ORF plus flanking DNA into a plasmid, followed by PCR-mediated mutagenesis to delete the first 217 amino acids or to mutate the indicated amino acid. Mutations were confirmed by sequencing, and the entire *orc1*- $\Delta$ *bah*-V5, *orc1*-*E124K*-V5, and *orc1*-*P185L*-V5 cassettes were integrated at the endogenous *ORC1* locus.

Alleles were moved into various genetic backgrounds through genetic crosses. Mating was carried out by mixing the two parental strains on malt extract (ME) medium (2% malt extract, 2% agar) and incubating at 30 °C for 2–3 d. Cells were then streaked on medium to select for diploids and subsequently transferred to ME plates for sporulation. After 3–4 d, the sporulated culture was suspended in 500  $\mu$ L water, incubated at 56 °C for 15 min,

and plated on medium to select for meiotic progeny of interest. Genotypes were confirmed by PCR.

**Growth Rates.** Yeast strains were grown in YPD overnight and diluted to an optical density (OD<sub>600</sub>) of  $\approx$ 0.25 in YPD. Growth was monitored by measuring the absorbance at 600 nm. Data from individual growth curves were used to calculate the doubling time using the Website (<http://www.doubling-time.com/compute.php>).

**Flow Cytometry.** Flow cytometry was conducted as previously described (4). Briefly, yeast were grown in YPD to an OD<sub>600</sub> of  $\approx$ 0.6 and fixed in 70% ethanol for 3 h. To digest RNA, cells were incubated in 2 mg/mL RNase A (Sigma, R-5503) at 4 °C for 36 h. To digest protein, cells were incubated in 5 mg/mL pepsin (Sigma, P-7000) at 37 °C for 15 min. Cells were then washed and resuspended in 1 mM Sytox Green (Molecular Probes, S-7020), sonicated 5 s at setting 1 on a Branson Sonifier 450, and analyzed by flow cytometry.

**Budding Index.** Yeast were grown to an OD<sub>600</sub> of  $\approx$ 0.8 and fixed in 1% formaldehyde for 10 min. Cells were collected, resuspended in PBS at an optical density of 0.5, and sonicated twice for 5 s at setting 2 on a Branson Sonifier 450. Samples were placed on a hemocytometer and viewed on a phase contrast microscope to count the numbers of unbudded and budded cells.

1. Hickman MA, Rusche LN (2009) The Sir2-Sum1 complex represses transcription using both promoter-specific and long-range mechanisms to regulate cell identity and sexual cycle in the yeast *Kluyveromyces lactis*. *PLoS Genet* 5:e1000710.
2. Gelbart ME, Rechsteiner T, Richmond TJ, Tsukiyama T (2001) Interactions of lsw2 chromatin remodeling complex with nucleosomal arrays: Analyses using recombinant yeast histones and immobilized templates. *Mol Cell Biol* 21: 2098–2106.
3. Funakoshi M, Hochstrasser M (2009) Small epitope-linker modules for PCR-based C-terminal tagging in *Saccharomyces cerevisiae*. *Yeast* 26:185–192.
4. Haase SB (2004) Cell cycle analysis of budding yeast using SYTOX Green. *Curr Protoc Cytom* Chapter 7:Unit 7.23.
5. Tamura K, Dudley J, Nei M, Kumar S (2007) MEGA4: Molecular Evolutionary Genetics Analysis (MEGA) software version 4.0. *Mol Biol Evol* 24:1596–1599.
6. Hou Z, Bernstein DA, Fox CA, Keck JL (2005) Structural basis of the Sir1-origins recognition complex interaction in transcriptional silencing. *Proc Natl Acad Sci USA* 102:8489–8494.
7. Zhang Z, Hayashi MK, Merkel O, Stillman B, Xu R-M (2002) Structure and function of the BAH-containing domain of Orc1p in epigenetic silencing. *EMBO J* 21:4600–4611.
8. Buchberger JR, et al. (2008) Sir3-nucleosome interactions in spreading of silent chromatin in *Saccharomyces cerevisiae*. *Mol Cell Biol* 28:6903–6918.
9. Sampath V, et al. (2009) Mutational analysis of the Sir3 BAH domain reveals multiple points of interaction with nucleosomes. *Mol Cell Biol* 29:2532–2545.





**Table S1. List of *K. lactis* strains used in this study**

| Strain  | Genotype                                                                                                                                                | Source                    |
|---------|---------------------------------------------------------------------------------------------------------------------------------------------------------|---------------------------|
| CK213   | <i>MATa lysA1 leu2 trp1 uraA1</i>                                                                                                                       | Chen and Clark-Walker (1) |
| SAY538  | <i>MAT<math>\alpha</math> nej1<math>\Delta</math>::LEU2 ade1 leu2 trp1 uraA1</i>                                                                        | Astrom (2)                |
| LRY2235 | <i>MATa ORC5-Flag::KanMX nej1<math>\Delta</math>::LEU2 leu2 trp1 uraA1</i>                                                                              |                           |
| LRY2239 | <i>MATa SIR2-HA::NatMX SIR4-Flag::KanMX myc-SUM1 nej1<math>\Delta</math>::LEU2 leu2 trp1 uraA1</i>                                                      |                           |
| LRY2285 | <i>MAT<math>\alpha</math> SIR2-HA::NatMX SIR4-Flag::KanMX myc-SUM1 nej1<math>\Delta</math>::LEU2 leu2 trp1 uraA1</i>                                    |                           |
| LRY2561 | <i>MATa ORC1-V5::HphMX lysA1 leu2 trp1 uraA1</i>                                                                                                        |                           |
| LRY2562 | <i>MATa orc1-<math>\Delta</math>bah-V5::HphMX lysA1 leu2 trp1 uraA1</i>                                                                                 |                           |
| LRY2563 | <i>MATa orc1-<math>\Delta</math>bah::HphMX SIR2-HA::NatMX SIR4-Flag::KanMX myc-SUM1 nej1<math>\Delta</math>::LEU2 leu2 trp1 uraA1</i>                   |                           |
| LRY2566 | <i>MATa orc1-V5::HphMX SIR2-HA::NatMX SIR4-Flag::KanMX myc-SUM1 nej1<math>\Delta</math>::LEU2 leu2 trp1 uraA1</i>                                       |                           |
| LRY2572 | <i>MATa ORC1-V5::HphMX sir2<math>\Delta</math>::NatMX SIR4-Flag::KanMX myc-SUM1 nej1<math>\Delta</math>::LEU2 leu2 trp1 uraA1</i>                       |                           |
| LRY2573 | <i>MATa ORC1-V5::HphMX SIR2-HA::NatMX sir4<math>\Delta</math>::URA3 myc-SUM1 nej1<math>\Delta</math>::LEU2 leu2 trp1 uraA1</i>                          |                           |
| LRY2574 | <i>MATa ORC1-V5::HphMX SIR2-HA::NatMX SIR4-Flag::KanMX sum1<math>\Delta</math>::NatMX nej1<math>\Delta</math>::LEU2 leu2 trp1 uraA1 lysA1</i>           |                           |
| LRY2576 | <i>MATa ORC1-V5::HphMX sir4<math>\Delta</math>::URA3 sum1<math>\Delta</math>::NatMX nej1<math>\Delta</math>::LEU2 leu2 trp1 uraA1</i>                   |                           |
| LRY2577 | <i>MATa ORC1-V5::HphMX sir2<math>\Delta</math>::NatMX sir4<math>\Delta</math>::URA3 myc-SUM1 nej1<math>\Delta</math>::LEU2 leu2 trp1 uraA1</i>          |                           |
| LRY2578 | <i>MATa ORC1-V5::HphMX sir2<math>\Delta</math>::NatMX SIR4-Flag::KanMX sum1<math>\Delta</math>::NatMX nej1<math>\Delta</math>::LEU2 leu2 trp1 uraA1</i> |                           |
| LRY2581 | <i>MAT<math>\alpha</math> ORC1-V5::HphMX nej1<math>\Delta</math>::LEU2 ade1 leu2 trp1 uraA1</i>                                                         |                           |
| LRY2656 | <i>MATa orc1-E124K-V5::HphMX lysA1 leu2 trp1 uraA1</i>                                                                                                  |                           |
| LRY2657 | <i>MATa orc1-P185L-V5::HphMX lysA1 leu2 trp1 uraA1</i>                                                                                                  |                           |
| LRY2709 | <i>MAT<math>\alpha</math> orc1-<math>\Delta</math>bah-V5::HphMX nej1<math>\Delta</math>::LEU2 ade1 leu2 trp1 uraA1</i>                                  |                           |
| LRY2711 | <i>MATa ORC4-V5::HphMX lysA1 leu2 trp1 uraA1</i>                                                                                                        |                           |

1. Chen XJ, Clark-Walker GD (1994) sir2 mutants of *Kluyveromyces lactis* are hypersensitive to DNA-targeting drugs. *Mol Cell Biol* 14:4501–4508.

2. Barsoum E, Sjöstrand JOO, Aström SU (2010) Ume6 is required for the MAT $\alpha$ /MAT $\alpha$  cellular identity and transcriptional silencing in *Kluyveromyces lactis*. *Genetics* 184:999–1011.

**Table S2. List of oligonucleotides used for this study**

|               |                                                               |
|---------------|---------------------------------------------------------------|
| <i>RRP7</i>   | GCAACAACAGATACTGTGGG<br>CCTACTACTAATGTGAAACCATC               |
| <i>ACT1</i>   | CGTCGCTTTGGACTTCGAACAA<br>GTGGTACCACCGGACATGAC                |
| <i>KARS12</i> |                                                               |
| 1             | CAAACACTCGGCTTGCTAG<br>GAAAGACTGTAGATTAGTAGACC                |
| 2             | CCA GCA ATG CGA ACA TAA CAC<br>GGA TTT CAC CAT GGT TCT TGA AG |
| 3             | CTATTCTCTGCCAAGCTATCC<br>GGTTCTGTCTACAGATTCCAC                |
| 4             | GGGCCTCTATTCAAATTACCTATG<br>GTTGGTGTCAAGTAACGACTAC            |
| 5             | GGAAGAGCTTCAGGGTC<br>GCGATCGAAATACGTAGATTGC                   |
| 6             | CACAGCATTAAAGCACCCTTC<br>GATCGACCTTCGATCCGTC                  |
| 7             | GAGCATGCGTTCTCTTCC<br>GTTGCGATTGGGCAGCG                       |
| <i>HML</i>    |                                                               |
| 1             | GTTTCATCGTTGTCATAACTTTCTCG<br>GATGATGGGGTGCCCGAAAG            |
| 2             | CGTATTATACATGACAGCCAAAGG<br>GTTGGGTGAATAAACCATCTCAC           |
| 3             | CCTGTACAATTGCTATGCCTACAG<br>CATGCCGCTTCTGTCTTTAGC             |
| 4             | CCACTTTAAAGGTTGGAGCATTG<br>GGGTTTAGCAATGAGTGTATGGG            |
| 5             | GGGTCCGTTTCTGGGATTAATG<br>CCGCTGCCGTTCTAAGTCTG                |
| 6             | GATACTCTGAGACTTTCTCTTGG<br>CAGTGACTGGTCATTAGCCGAG             |
| 7             | GTAAGTCTAAGGGAAGCTGG<br>GGACAGGATACCGTGTAATACC                |
| 8             | GCTGTTGAATATTGGATTGGGCTG<br>GTAAGTCTTGTCCATTAAAGCTG           |
| 9             | GGCTGAAGTTCGATGAACTAGG<br>GGTGTCCGCATACAACTTC                 |
| 10            | CAAGCCCCTACTACCAAACATG<br>GTAAGTCTGACTTCGTGGCC                |
| 11            | GAAGGGATTTAGTGGTATCTCAAC<br>CCAAACATAAGGTATCTCTTCTATG         |
| 12            | GCATATATTTAGTACGGTGAGC<br>CTTCAAAAAGAATAGTGCTTACTGG           |
| <i>HMR</i>    |                                                               |
| 1             | CTACTACCACTGCCTCTGAAAAC<br>CTGGAATCGTTGTTAGAGCCTG             |
| 2             | CTGGTGCGTCATCAACTAGC<br>GGGATAAATACGGATAGGGTATC               |
| 3             | CCAGTAAAGAACACACACCGC<br>GAGCGAAGACCCTTTCTGAG                 |
| 4             | GCGACAACAAGTGGAAGAGTTG<br>CTCTAGACATGCATGTCCGAC               |
| 5             | CAGGAGATGCAGACCATAGC<br>CGAGCTAAAATAGCTCGGGTC                 |
| 6             | CGCCTTCTCACAAACTAC<br>GTCGAATGACATGGGAGAC                     |
| 7             | CCACATAGATACGTCCCTGTTTTAG<br>GACTCCGGTCAATGCTGAGG             |
| 8             | CCATCAAATGGTGTGAATTGAATCTC<br>CCTGAATATTAACGATTGCTCACC        |
